# Supplementary material for: Emergence of large-scale cell death through ferroptotic trigger waves
Source: PubMed Central journal article supplement (PMC11639682; doi:10.1038/s41586-024-07623-6), 2024-07-10
Supplement: 41586_2024_7623_MOESM1_ESM.pdf [file 41586_2024_7623_MOESM1_ESM.pdf]

## Supplementary information

---

# Emergence of large-scale cell death through ferroptotic trigger waves

---

In the format provided by the  
authors and unedited

# Emergence of large-scale cell death via trigger waves of ferroptosis

Hannah K. C. Co, Chia-Chou Wu, Yi-Chen Lee, Sheng-hong Chen \*

\* **Correspondence:** shengchen@gate.sinica.edu.tw

## Supplementary Information

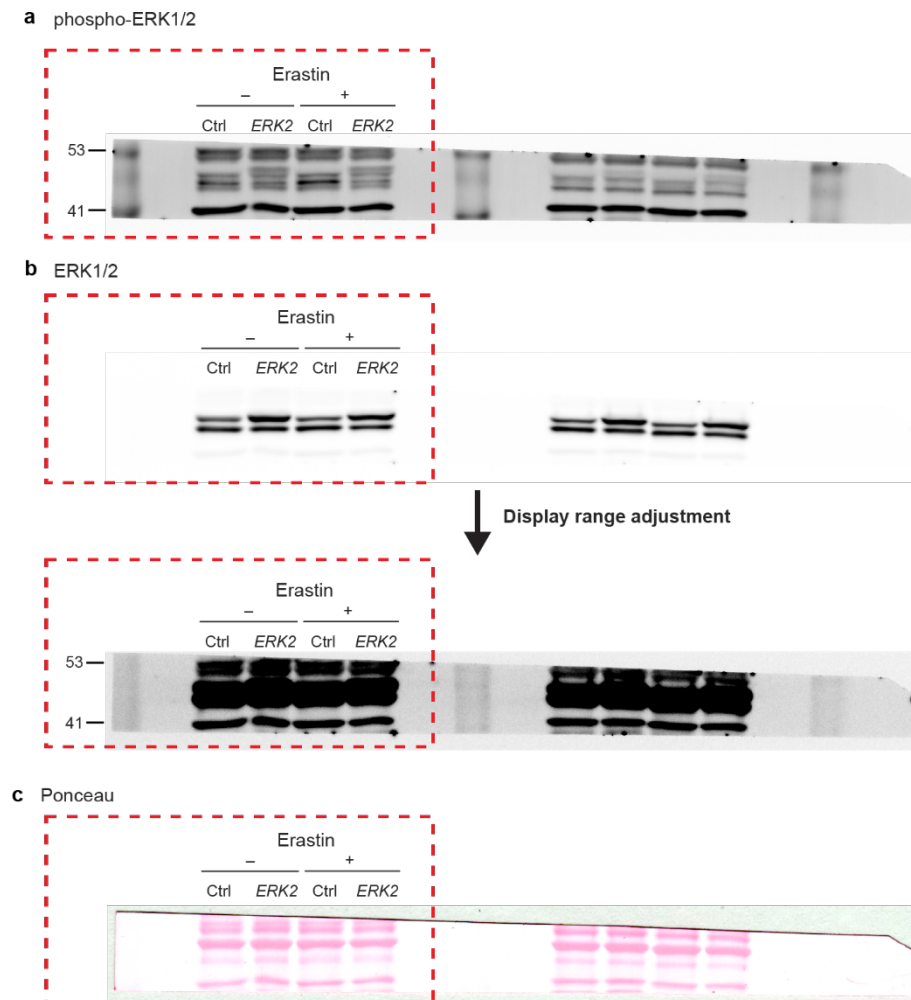

### Supplementary Figure 1. Uncropped blot for Extended Data Fig. 8b.

**a, b**, Western blots of phospho-ERK1/2 (**a**) and ERK1/2 with the molecular markers (**b**). The red box indicates the cropped region shown in Extended Data Fig. 8b. **c**, Ponceau staining of blot in (**a, b**). (**a-c**) are the same blot.
